# Supplementary material for: Identification of CRF89_BF, a new member of an HIV-1 circulating BF intersubtype recombinant form family widely spread in South America
Source: PubMed Central journal article supplement (PMC8169922; doi:10.1038/s41598-021-90023-x), 2021-06-01
Supplement: 41598_2021_90023_MOESM1_ESM.pdf [file 41598_2021_90023_MOESM1_ESM.pdf]

**Identification of CRF89\_BF, a new member of an HIV-1 circulating BF intersubtype recombinant form family widely spread in South America.**

Elena Delgado, Aurora Fernández-García, Marcos Pérez-Losada, María Moreno-Lorenzo, Ismael Fernández-Miranda, Sonia Benito, Vanessa Montero, Horacio Gil, Silvia Hernáez, Josefa Muñoz, Miren Z. Zubero-Sulibarria, Elena García-Bodas, Mónica Sánchez, Jorge del Romero, Carmen Rodríguez, Luis Elorduy, Elena Bereciartua, Esther Culebras, Icíar Rodríguez-Avial, María Luisa Giménez-Alarcón, Carmen Martín-Salas, Carmen Gómez-González, José J García-Irure, Gema Cenxual, Ana Martínez-Sapiña, María Maiques-Camarero, Lucía Pérez-Álvarez, and Michael M Thomson.

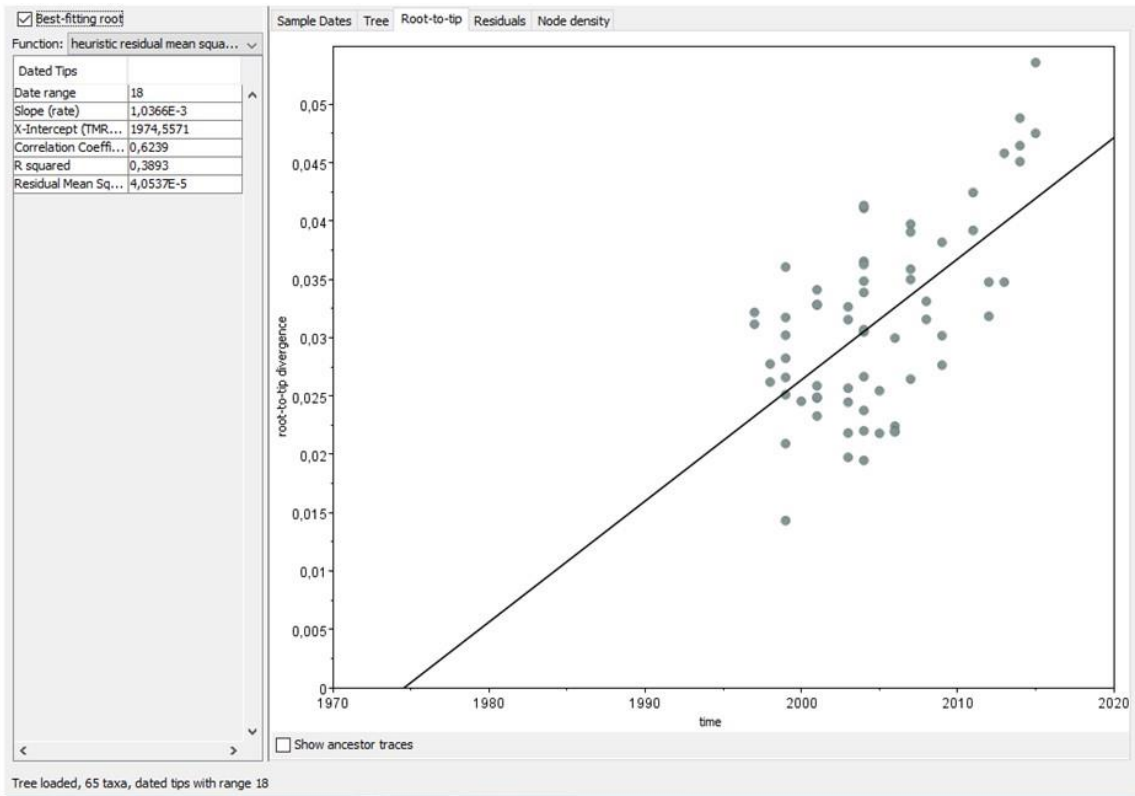

**Supplementary Fig. S1. Analysis of root-to-tip divergence vs. year of sample collection of 65 CRF12\_BF Pr-RT sequences with TempEst.** The analysis was done after removing 8 outlying sequences identified in initial analyses.

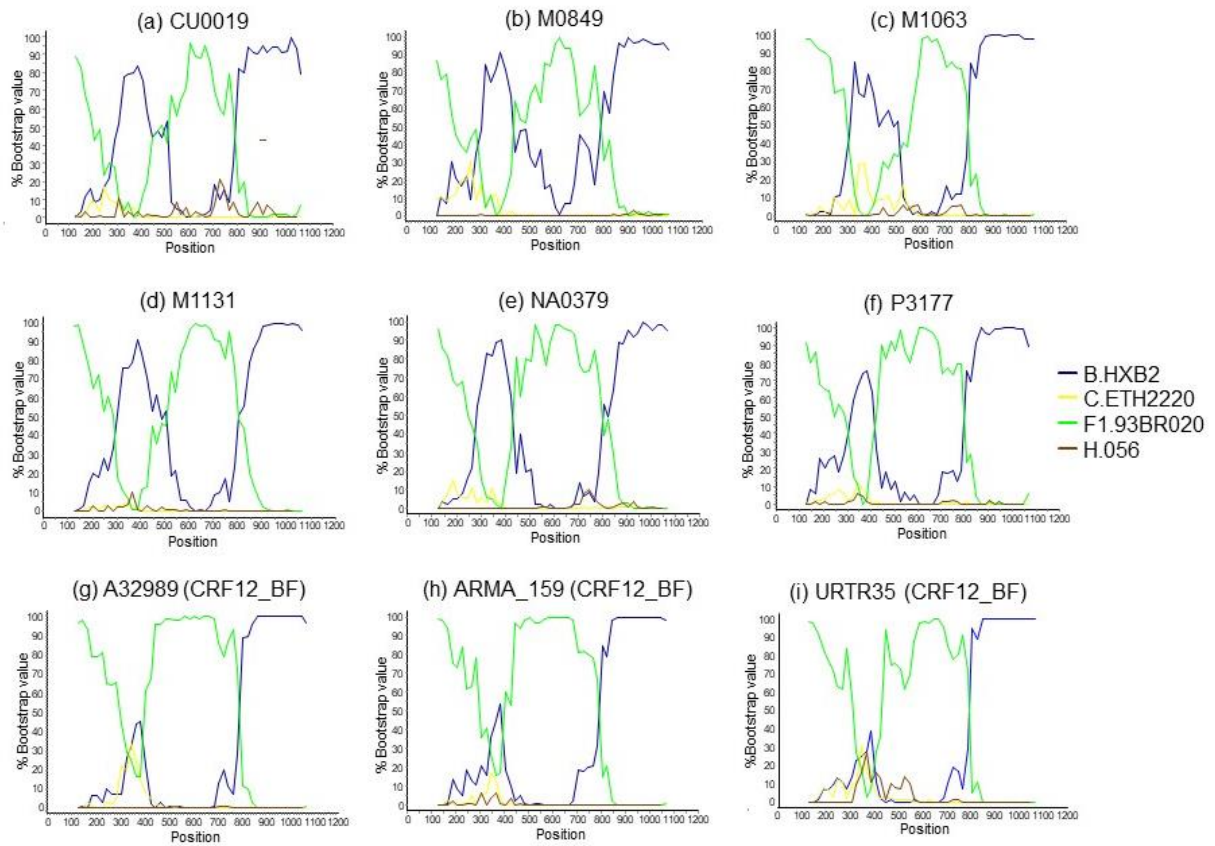

**Supplementary Fig. S2. Bootscan analyses of 6 Pr-RT sequences of the BF cluster (a-f) and 3 of CRF12\_BF (g-i).** The horizontal axis represents the position from the 3' end of protease of the mid-point of a 250 nt window moving in 20 nt increments and the vertical axis represents bootstrap values supporting clustering with subtype reference sequences.

**Supplementary Table 1. Clinical data of patients at the time of sample collection.**

| <b>Sample ID</b> | <b>Plasma viral load (cp/ml)</b> | <b>CD4+ T-cell count (cells/<math>\mu</math>l)</b> | <b>Clinical stage</b> | <b>Antiretroviral therapy</b> |
|------------------|----------------------------------|----------------------------------------------------|-----------------------|-------------------------------|
| <b>CU0019</b>    | 1,510                            | 942                                                | A1                    | No                            |
| <b>CU0020</b>    | 66,300                           | 433                                                | A2                    | No                            |
| <b>M0849</b>     | 76,700                           | 450                                                | A2                    | No                            |
| <b>M1063</b>     | 4,069                            | 479                                                | A2                    | No                            |
| <b>M1079</b>     | 8,790                            | 994                                                | A1                    | No                            |
| <b>M1131</b>     | 100,000                          | 285                                                | n.a.                  | No                            |
| <b>MS0254</b>    | 16,330                           | 704                                                | A1                    | No                            |
| <b>MS0360</b>    | 552,000                          | 247                                                | A2                    | No                            |
| <b>NA0239</b>    | 2,360,000                        | 281                                                | C2                    | No                            |
| <b>NA0379</b>    | 3,210,000                        | 39                                                 | C1                    | No                            |
| <b>P2345</b>     | 5,440                            | 208                                                | C2                    | No                            |
| <b>P2346</b>     | 356,400                          | 202                                                | A2                    | No                            |
| <b>P2633</b>     | 1,174,897                        | 8                                                  | B3                    | No                            |
| <b>P3174</b>     | 10,000,000                       | 1080                                               | B1                    | No                            |
| <b>P3177</b>     | 1,100,000                        | 307                                                | B2                    | No                            |
| <b>P4464</b>     | 270,000                          | 330                                                | A2                    | No                            |
| <b>P5090</b>     | 167,000                          | 445                                                | A2                    | No                            |
| <b>TO0275</b>    | 21,600                           | 469                                                | A2                    | No                            |
| <b>Z0275</b>     | 14,5000                          | 380                                                | A2                    | No                            |

n.a.: datum not available.



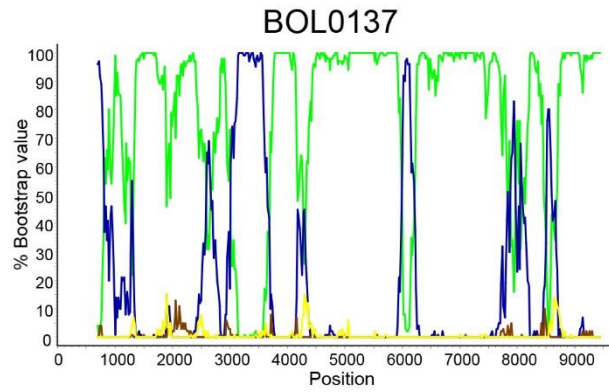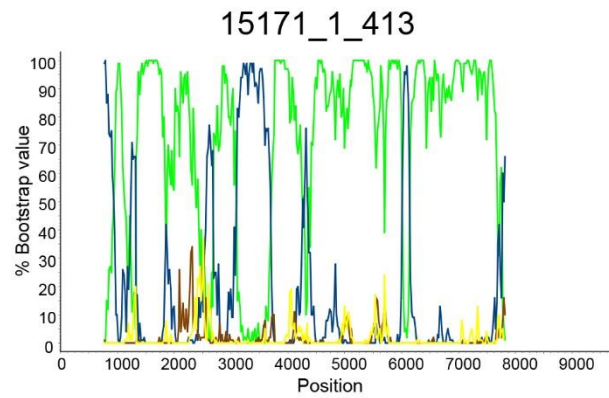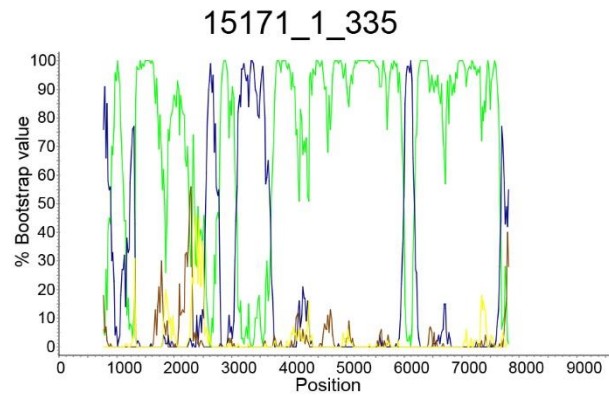

— B.HXB2 — C.ETH2220 — F1.93BR020 — H.056

**Supplementary Fig. S4. Boots can plots of two sequences of ~7 kb of the BF cluster from UK.** The horizontal axis represents the position in the HXB2 genome of the mid-point of a 250 nt window moving in 20 nt increments and the vertical axis represents bootstrap values supporting clustering with subtype reference sequences. The boots can plot of the NFLG sequence of BOL0137 is shown on top for comparison.

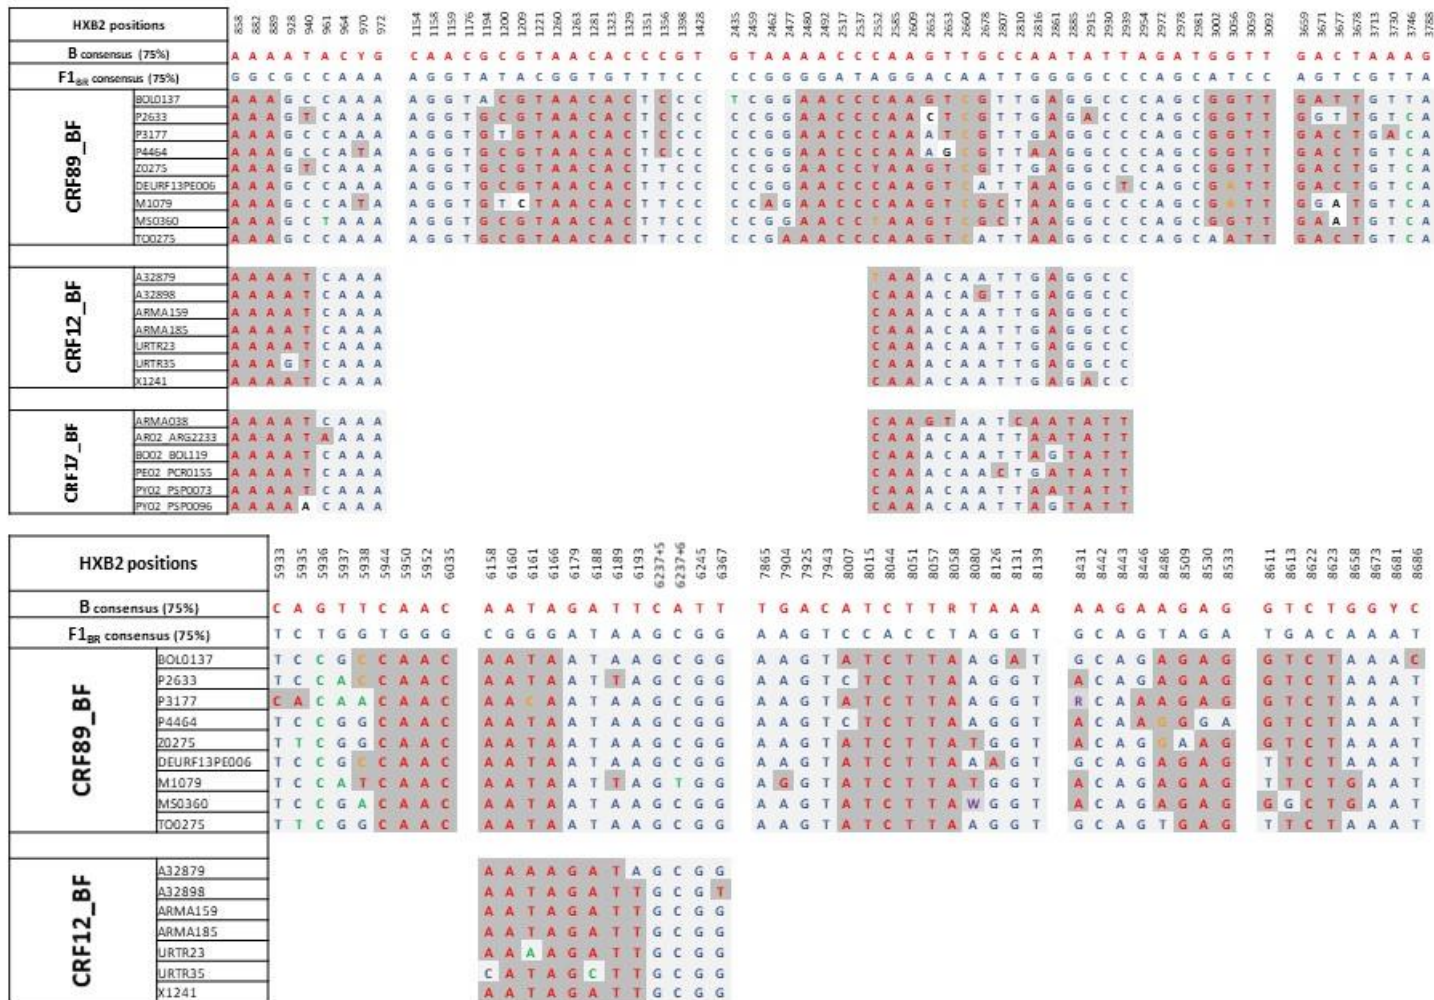

**Supplementary Fig. S5.** Intersubtype transitions in viruses of the BF cluster (CRF89\_BF). On top of upper and lower panels, 75% consensus nts of the parental clades, subtype B and the Brazilian F1 subtype strain, are shown at positions (HXB2 numeration) where they differ. Nts in viruses of the BF cluster are in red or blue if they are identical to the B or F1 consensus, respectively, and in orange or green if they coincide in nt class (purine or pyrimidine) with B or F1 consensus, respectively, at positions in which consensus differ in nt class. Dark and light grey backgrounds indicate coincidence with B or F1 consensus, respectively. Mixture of nts coincident with B and F1 consensus are in purple with intermediate gray background. Nts not coinciding with any of the subtype consensus are in black with white background. Intersubtype transitions are shown for CRF12\_BF and CRF17\_BF at breakpoints where they differ from BF cluster viruses.

**Supplementary Table 2. Likelihood mapping analysis of segments 1185-1339, 7975-8069, and 8466-8640.**

| <b>Segment (HXB2 positions)</b> | <b>Virus ID</b> | <b>Resolved (%)</b> | <b>Partly resolved (%)</b> | <b>Unresolved (%)</b> |
|---------------------------------|-----------------|---------------------|----------------------------|-----------------------|
| 1185-1339                       | BOL0137         | 85.8                | 4.2                        | 10                    |
| 1185-1339                       | P2633           | 85.1                | 0                          | 14.9                  |
| 1185-1339                       | P3177           | 86.25               | 3.1                        | 10.65                 |
| 1185-1339                       | P4464           | 80.35               | 5.75                       | 13.9                  |
| 1185-1339                       | Z0275           | 81.1                | 2.95                       | 15.95                 |
| 1185-1339                       | DEURF13PE006    | 80.75               | 6.6                        | 12.65                 |
| 1185-1339                       | M1079           | 76.45               | 0                          | 23.55                 |
| 1185-1339                       | MS0360          | 80.2                | 1.6                        | 18.2                  |
| 1185-1339                       | TO0275          | 79.35               | 1.65                       | 19                    |
|                                 |                 |                     |                            |                       |
| 7975-8069                       | BOL0137         | 87.45               | 3.9                        | 8.65                  |
| 7975-8069                       | P2633           | 87.85               | 9.15                       | 3                     |
| 7975-8069                       | P3177           | 84                  | 4.95                       | 11.05                 |
| 7975-8069                       | P4464           | 81.15               | 1.25                       | 17.6                  |
| 7975-8069                       | Z0275           | 85.4                | 4.2                        | 10.4                  |
| 7975-8069                       | DEURF13PE006    | 75                  | 1.2                        | 23.4                  |
| 7975-8069                       | M1079           | 81.65               | 0                          | 18.35                 |
| 7975-8069                       | MS0360          | 94                  | 0                          | 6                     |
| 7975-8069                       | TO0275          | 75.2                | 6.95                       | 17.85                 |
|                                 |                 |                     |                            |                       |
| 8466-8640                       | BOL0137         | 78                  | 10                         | 11                    |
| 8466-8640                       | P2633           | 75.8                | 14.1                       | 10                    |
| 8466-8640                       | P3177           | 77.2                | 14.5                       | 8.65                  |
| 8466-8640                       | P4464           | 81.4                | 5.6                        | 13                    |
| 8466-8640                       | Z0275           | 88                  | 8.1                        | 3.9                   |
| 8466-8640                       | DEURF13PE006    | 85.3                | 12.1                       | 2.6                   |
| 8466-8640                       | M1079           | 88.65               | 8.6                        | 2.75                  |
| 8466-8640                       | MS0360          | 86.9                | 6.6                        | 6.5                   |
| 8466-8640                       | TO0275          | 82.15               | 5.85                       | 12                    |

Percentages correspond to fully resolved, partly resolved, and unresolved quartets, with alignments comprising each BF virus and 3 subtype B, 3 subsubtype F1, and 1 subtype C viruses (the last one used as outgroup).



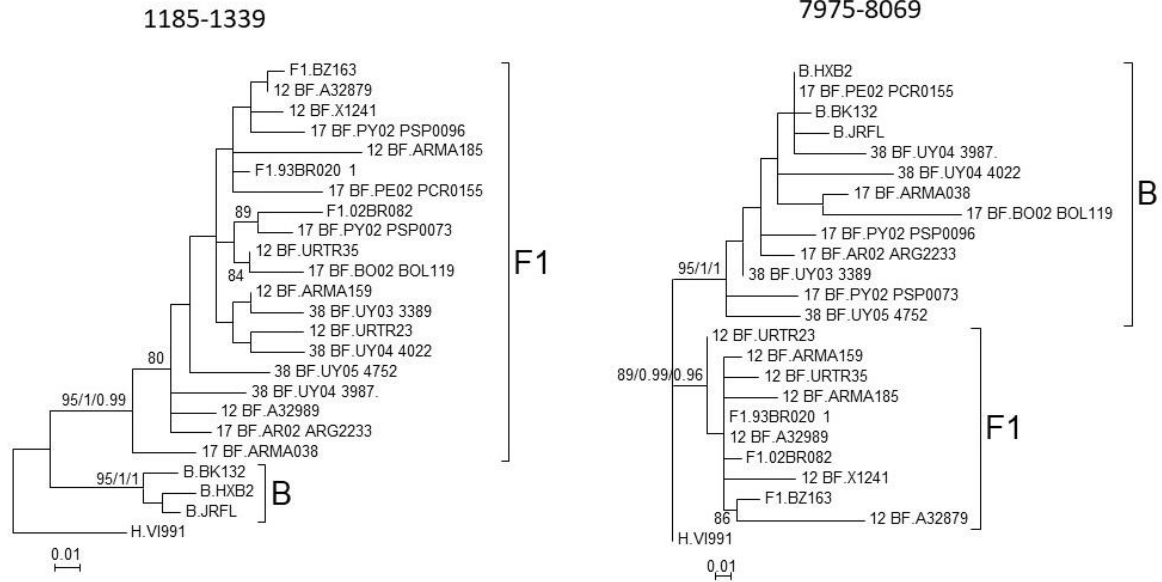

**Supplementary Fig. S6. Phylogenetic trees of genome segments 1185-1339 and 7975-8069 of CRF12\_BF, CRF17\_BF, and CRF38\_BF.** Names of subtype and CRF references are preceded by the corresponding subtype or CRF. Node support values of B and F1 clades are indicated, in this order, as ultrafast bootstrap value/aLRT SH-like support/posterior probability, which were obtained with IQ-Tree, PhyML, and MrBayes programs, respectively. For the other nodes, only ultrafast bootstrap values are indicated. Only ultrafast bootstrap values  $\geq 80\%$  are shown.

**Supplementary Table 3. Intersubtype breakpoints in BF cluster genomes detected with GARD, RDP4, and jpHMM programs.**

| Interclade consensus transition midpoint (interval) | 909<br>(889-928) | 1185<br>(1176-1194) | 1340<br>(1329-1351) | 2479<br>(2477-2480) | 2743<br>(2678-2807) | 2992<br>(2981-3002) | 3696<br>(3678-3713) | 5941<br>(5937-5944) | 6173<br>(6166-6179) | 7975<br>(7943-8007) | 8069<br>(8058-8080) | 8466<br>(8446-8486) | 8641<br>(8623-8658) |
|-----------------------------------------------------|------------------|---------------------|---------------------|---------------------|---------------------|---------------------|---------------------|---------------------|---------------------|---------------------|---------------------|---------------------|---------------------|
| <b>GARD</b>                                         |                  |                     |                     |                     |                     |                     |                     |                     |                     |                     |                     |                     |                     |
| BOL0137                                             | 961              | 1169                | 1334                | 2477                | 2694                | 2972                | 3705                | 5941                | 6170                | 7967                | 8057                | 8509                | 8624                |
| P2633                                               | 927              | 1169                | 1336                | 2477                | 2683                | 2981                | 3658                | 5941                | 6170                | 7967                | 8057                | 8449                | 8623                |
| P3177                                               | 908              | 1185                | 1339                | 2477                | 2673                | 2981                | 3705                | 5933                | 6171                | 7973                | 8058                | 8474                | 8627                |
| P4464                                               | 927              | 1169                | 1336                | 2481                | 2677                | 2981                | 3705                | 5935                | 6171                | 7925                | 8057                | 8574                | 8623                |
| Z0275                                               | 916              | 1169                | 1261                | 2477                | 2677                | 2981                | 3706                | 5938                | 6172                | 7973                | 8079                | 8552                | 8623                |
| DEURF13                                             | 927              | 1185                | 1339                | 2480                | 2653                | 2981                | 3706                | 5933                | 6173                | 7986                | 8057                | 8571                | 8624                |
| M1079                                               | 880              | 1169                | 1336                | 2477                | 2652                | 2981                | 3688                | 5938                | 6171                | 7973                | 8093                | 8483                | 8671                |
| MS0360                                              | 916              | 1169                | 1440                | 2477                | 2753                | 2981                | 3665                | 5929                | 6172                | 7967                | 8079                | 8505                | 8671                |
| TO0275                                              | 916              | 1169                | 1336                | 2466                | 2786                | 3023                | 3705                | 5941                | 6171                | ND                  | ND                  | 8487                | 8586                |
| <b>RDP4</b>                                         |                  |                     |                     |                     |                     |                     |                     |                     |                     |                     |                     |                     |                     |
| BOL0137                                             | 954              | 1187                | 1337                | 2494                | 2792                | 2990                | 3673                | 5940                | 6173                | 7975                | 8070                | 8500                | 8636                |
| P2633                                               | 899              | 1182                | 1350                | 2489                | 2792                | 2990                | 3665                | 5940                | 6173                | ND                  | ND                  | 8475                | 8672                |
| P3177                                               | 914              | 1182                | 1346                | 2489                | 2787                | 2990                | 3693                | 5938                | 6173                | 7965                | 8068                | 8444                | 8625                |
| P4464                                               | 899              | 1129                | 1338                | 2489                | 2787                | 2990                | 3696                | 5938                | 6173                | ND                  | ND                  | 8520                | 8634                |
| Z0275                                               | ND               | 1192                | 1357                | 2489                | 2787                | 2990                | 3690                | 5941                | 6173                | 7975                | 8083                | 8500                | 8635                |
| DEURF13                                             | ND               | 1178                | 1327                | 2489                | 2787                | 2994                | 3685                | 5941                | 6173                | ND                  | ND                  | 8500                | 8626                |
| M1079                                               | ND               | ND                  | ND                  | 2460                | 2883                | 2990                | 3729                | 5940                | 6173                | ND                  | ND                  | 8506                | 8660                |
| MS0360                                              | ND               | ND                  | ND                  | 2478                | 2703                | 3053                | 3666                | 5952                | 6169                | 7985                | 8104                | 8491                | 8660                |
| TO0275                                              | ND               | 1178                | 1327                | 2470                | 2672                | 3053                | 3692                | 5941                | 6173                | 7946                | 8069                | 8500                | 8653                |
| <b>jpHMM</b>                                        |                  |                     |                     |                     |                     |                     |                     |                     |                     |                     |                     |                     |                     |
| BOL0137                                             | ND               | 1185±8              | 1403±46             | 2488±25             | ND                  | ND                  | 3705±24             | 5940±2              | 6173±6              | ND                  | ND                  | 8485±22             | 8648±25             |
| P2633                                               | 940±20           | 1185±13             | 1395±39             | 2338±33             | ND                  | ND                  | 3739±59             | 5941±2              | 6173±6              | ND                  | ND                  | 8493±16             | 8670±44             |
| P3177                                               | 909±9            | 1183±11             | 1392±33             | 2472±33             | ND                  | ND                  | 3790±19             | 5941±2              | 6173±6              | ND                  | ND                  | 8481±18             | 8655±22             |
| P4464                                               | 848±58           | 1183±11             | 1392±33             | 2492±23             | ND                  | ND                  | 3745±63             | 5933±11             | 6173±6              | ND                  | ND                  | 8498±6              | 8676±7              |
| Z0275                                               | ND               | 1183±10             | 1375±22             | 2492±23             | ND                  | ND                  | 3705±23             | 5940±2              | 6173±6              | ND                  | ND                  | 8512±19             | 8649±22             |
| DEURF13                                             | 914±23           | 1183±10             | 1375±23             | 2489±27             | ND                  | ND                  | 3746±63             | 5940±2              | 6173±6              | ND                  | ND                  | 8461±10             | 8671±36             |
| M1079                                               | 919±29           | ND                  | ND                  | 2477±38             | ND                  | ND                  | 3648±22             | 5941±2              | 6173±6              | ND                  | ND                  | 8437±48             | 8655±25             |
| MS0360                                              | 915±6            | 1183±10             | 1389±64             | 2492±24             | ND                  | ND                  | 3718±11             | 5940±3              | 6173±6              | ND                  | ND                  | 8430±56             | 8653±28             |
| TO0275                                              | ND               | 1183±10             | 1389±64             | 2400±77             | ND                  | ND                  | 3750±58             | 5941±3              | 6173±6              | ND                  | ND                  | 8497±5              | 8688±20             |

On top, intersubtype consensus transition intervals (using as parental references 75% consensus subtype B and the Brazilian subsubtype F1 strain, see supplementary Fig. S5) and respective midpoints are shown. Breakpoints falling more than 50 nt outside of those intervals are in red. ND: breakpoint not detected near the corresponding interval. Shaded areas represent subtype B segments delimited by the breakpoints detected by each program.

**Supplementary Table 4. Signature amino acid residues of CRF89\_BF viruses.**

| Protein          | p17 <sup>gag</sup>                                                                | p24 <sup>gag</sup>                                                               | p24 <sup>gag</sup> | p6 <sup>gag</sup>                                     | GagPolTF                                              | Protease                                                                          | Tat                                                   | Tat                                                                               | Rev      | Vif                                                   | Vif      | Vif                                                   |
|------------------|-----------------------------------------------------------------------------------|----------------------------------------------------------------------------------|--------------------|-------------------------------------------------------|-------------------------------------------------------|-----------------------------------------------------------------------------------|-------------------------------------------------------|-----------------------------------------------------------------------------------|----------|-------------------------------------------------------|----------|-------------------------------------------------------|
| Residue position | 12                                                                                | 6                                                                                | 211                | 30                                                    | 46                                                    | 12                                                                                | 47                                                    | 63                                                                                | 5        | 136                                                   | 151      | 154                                                   |
| B.HXB2           | E                                                                                 | I                                                                                | L                  | P                                                     | A                                                     | T                                                                                 | Y                                                     | Q                                                                                 | S        | Q                                                     | A        | I                                                     |
| CRF89_BF         | <b>BOL0137</b>                                                                    | <b>Q</b>                                                                         | <b>M</b>           | <b>I</b>                                              | <b>K</b>                                              | <b>E</b>                                                                          | <b>E</b>                                              | <b>N</b>                                                                          | <b>R</b> | <b>P</b>                                              | <b>S</b> | <b>L</b>                                              |
|                  | <b>P2633</b>                                                                      | <b>E</b>                                                                         | <b>M</b>           | <b>I</b>                                              | <b>K</b>                                              | <b>E</b>                                                                          | <b>E</b>                                              | <b>N</b>                                                                          | <b>R</b> | <b>P</b>                                              | <b>S</b> | <b>L</b>                                              |
|                  | <b>P3177</b>                                                                      | <b>Q</b>                                                                         | <b>M</b>           | <b>I</b>                                              | <b>K</b>                                              | <b>E</b>                                                                          | <b>E</b>                                              | <b>N</b>                                                                          | <b>R</b> | <b>P</b>                                              | <b>S</b> | <b>L</b>                                              |
|                  | <b>M1079</b>                                                                      | <b>Q</b>                                                                         | <b>A</b>           | <b>I</b>                                              | <b>K</b>                                              | <b>E</b>                                                                          | <b>E</b>                                              | <b>N</b>                                                                          | <b>R</b> | <b>P</b>                                              | <b>S</b> | <b>L</b>                                              |
|                  | <b>MS0360</b>                                                                     | <b>E</b>                                                                         | <b>I</b>           | <b>I</b>                                              | <b>K</b>                                              | <b>E</b>                                                                          | <b>E</b>                                              | <b>N</b>                                                                          | <b>R</b> | <b>P</b>                                              | <b>S</b> | <b>L</b>                                              |
|                  | <b>P4464</b>                                                                      | <b>K</b>                                                                         | <b>M</b>           | <b>I</b>                                              | <b>K</b>                                              | <b>E</b>                                                                          | <b>E</b>                                              | <b>N</b>                                                                          | <b>R</b> | <b>P</b>                                              | <b>S</b> | <b>L</b>                                              |
|                  | <b>DEURF13PE006</b>                                                               | <b>Q</b>                                                                         | <b>M</b>           | <b>I</b>                                              | <b>E</b>                                              | <b>G</b>                                                                          | <b>K</b>                                              | <b>N</b>                                                                          | <b>R</b> | <b>P</b>                                              | <b>S</b> | <b>L</b>                                              |
|                  | <b>TO0275</b>                                                                     | <b>Q</b>                                                                         | <b>M</b>           | <b>I</b>                                              | <b>E</b>                                              | <b>G</b>                                                                          | <b>K</b>                                              | <b>N</b>                                                                          | <b>R</b> | <b>P</b>                                              | <b>S</b> | <b>L</b>                                              |
| <b>Z0275</b>     | <b>Q</b>                                                                          | <b>M</b>                                                                         | <b>I</b>           | <b>K</b>                                              | <b>E</b>                                              | <b>E</b>                                                                          | <b>N</b>                                              | <b>R</b>                                                                          | <b>P</b> | <b>S</b>                                              | <b>L</b> |                                                       |
| CRF12_BF         | <b>E</b> <sup>(71%)</sup> / <b>K</b> <sup>(29%)</sup>                             | L                                                                                | L                  | Q                                                     | <b>A</b> <sup>(86%)</sup> / <b>T</b> <sup>(14%)</sup> | <b>T</b> <sup>(71%)</sup> / <b>E</b> <sup>(14%)</sup> / <b>I</b> <sup>(14%)</sup> | Y                                                     | Q                                                                                 | S        | <b>Q</b> <sup>(86%)</sup> / <b>P</b> <sup>(14%)</sup> | T        | I                                                     |
| CRF17_BF         | <b>E</b> <sup>(67%)</sup> / <b>K</b> <sup>(17%)</sup> / <b>Q</b> <sup>(17%)</sup> | L                                                                                | L                  | <b>Q</b> <sup>(83%)</sup> / <b>P</b> <sup>(17%)</sup> | A                                                     | <b>T</b> <sup>(83%)</sup> / <b>E</b> <sup>(17%)</sup>                             | Y                                                     | <b>Q</b> <sup>(50%)</sup> / <b>K</b> <sup>(33%)</sup> / <b>P</b> <sup>(17%)</sup> | S        | <b>Q</b> <sup>(83%)</sup> / <b>P</b> <sup>(17%)</sup> | T        | <b>I</b> <sup>(67%)</sup> / <b>V</b> <sup>(33%)</sup> |
| CRF38_BF         | K                                                                                 | L                                                                                | L                  | Q                                                     | <b>A</b> <sup>(75%)</sup> / <b>T</b> <sup>(25%)</sup> | <b>T</b> <sup>(75%)</sup> / <b>K</b> <sup>(25%)</sup>                             | <b>Y</b> <sup>(75%)</sup> / <b>H</b> <sup>(25%)</sup> | <b>Q</b> <sup>(50%)</sup> / <b>P</b> <sup>(50%)</sup>                             | S        | <b>Q</b> <sup>(75%)</sup> / <b>P</b> <sup>(25%)</sup> | T        | <b>I</b> <sup>(50%)</sup> / <b>L</b> <sup>(50%)</sup> |
| CRF44_BF         | K                                                                                 | L                                                                                | L                  | Q                                                     | A                                                     | <b>E</b> <sup>(33%)</sup> / <b>K</b> <sup>(33%)</sup> / <b>Q</b> <sup>(33%)</sup> | Y                                                     | Q                                                                                 | S        | <b>P</b>                                              | T        | V                                                     |
| F1 (BR)          | K                                                                                 | <b>L</b> <sup>(75%)</sup> / <b>P</b> <sup>(17%)</sup> / <b>V</b> <sup>(8%)</sup> | L                  | Q                                                     | <b>A</b> <sup>(83%)</sup> / <b>T</b> <sup>(17%)</sup> | <b>T</b> <sup>(75%)</sup> / <b>A</b> <sup>(17%)</sup> / <b>K</b> <sup>(8%)</sup>  | <b>Y</b> <sup>(75%)</sup> / <b>H</b> <sup>(25%)</sup> | <b>Q</b> <sup>(92%)</sup> / <b>K</b> <sup>(8%)</sup>                              | S        | Q                                                     | T        | <b>I</b> <sup>(92%)</sup> / <b>A</b> <sup>(8%)</sup>  |

Amino acid residue positions are numbered according to the proteins of the HIV-1 HXB2 isolate. Signature amino acids of CRF89\_BF (found in most CRF89\_BF viruses but absent or uncommon in the related CRF12\_BF, CRF17\_BF, CRF38\_BF, and CRF44\_BF, and in the parental Brazilian F1 strain) are shown in boldface.

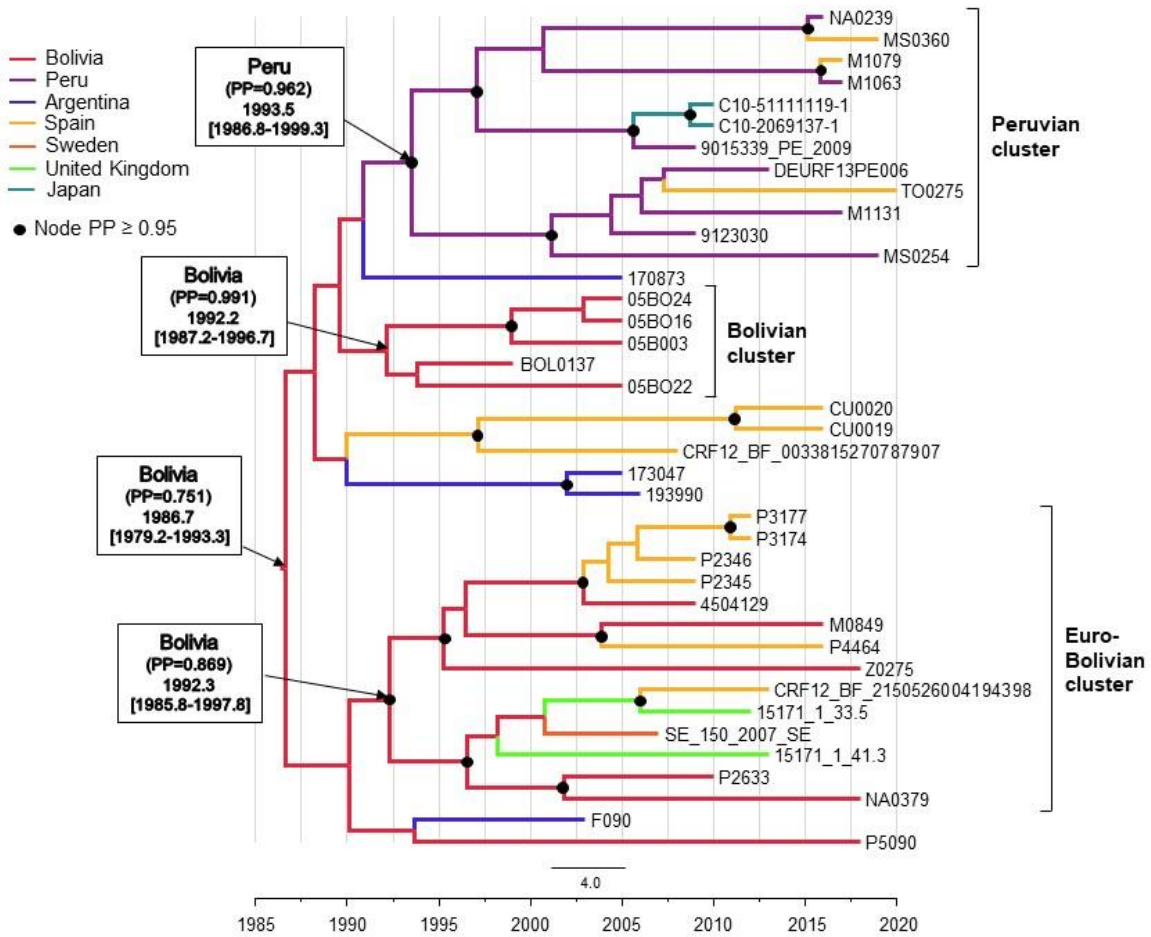

**Supplementary Fig. S7. Maximum clade credibility tree of CRF89\_BF Pr-RT sequences with location traits of some sequences from Bolivian and Peruvian individuals residing in Spain changed to Spain.** The analysis was done with the same parameters as an earlier analysis (whose posterior tree distribution is summarized in the MCC tree shown in Fig. 6), only changing the location traits of some samples from Peruvian (M1079, MS0360) or Bolivian (P2345, P3177) individuals residing in Spain belonging to clusters of relatively recent origin from Peru or Bolivia to Spain. The rest of the figure description is as in the legend of Fig. 6.

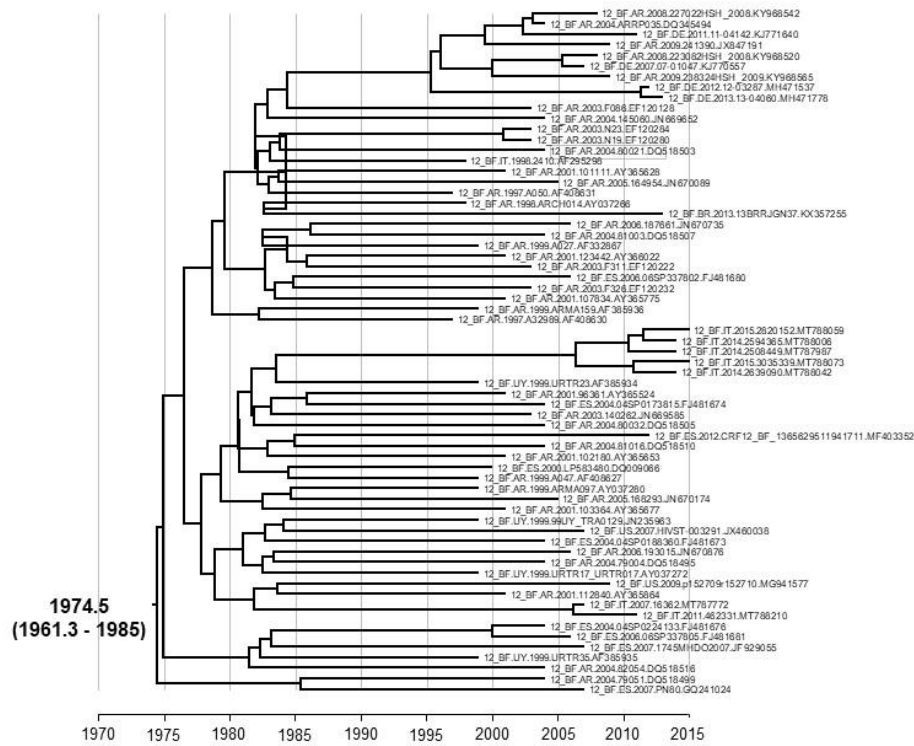

**Supplementary Fig. S8. Maximum clade credibility tree of CRF12\_BF Pr-RT sequences. Mean tMRCA and 95% HPD interval at the root are shown.**
